# Supplementary material for: Fit to Perform: A Profile of Higher Education Music Students’ Physical Fitness
Source: PubMed Central journal article supplement (PMC7066496; doi:10.3389/fpsyg.2020.00298), 2020-03-05
Supplement: Data_Sheet_1.pdf [file Data_Sheet_1.pdf]

**SUPPLEMENTARY TABLE 1 |** Descriptive statistics for the health-related fitness indicators used in the *Fit to Perform* screening protocol by instrument group and sex.

| Measure                     | Strings         |                 | Keyboard        |                 | Woodwinds       |                  | Brass           |                 | Voice           |                 | Percussion |                  | Other                 |                 |
|-----------------------------|-----------------|-----------------|-----------------|-----------------|-----------------|------------------|-----------------|-----------------|-----------------|-----------------|------------|------------------|-----------------------|-----------------|
|                             | Women           | Men             | Women           | Men             | Women           | Men              | Women           | Men             | Women           | Men             | Women      | Men              | Women                 | Men             |
| <b>Lung function</b>        | <b>M ± SD</b>   |                 |                 |                 |                 |                  |                 |                 |                 |                 |            |                  |                       |                 |
| FEV <sub>1</sub>            | 2.80<br>±0.63   | 3.86<br>±0.95   | 2.67<br>±0.63   | 3.64<br>±1.05   | 3.03<br>±0.42   | 3.74<br>±0.98    | 3.15<br>±0.52   | 4.70<br>±0.61   | 2.92<br>±0.49   | 3.52<br>±0.38   | -          | 3.72<br>±0.95    | 3.01 <sup>[1]</sup>   | 4.42<br>±0.86   |
| FEV <sub>1</sub> %pred      | 86.83<br>±17.69 | 88.46<br>±20.41 | 87.61<br>±19.94 | 87.43<br>±21.96 | 91.91<br>±11.27 | 85.18<br>±19.54  | 97.75<br>±13.75 | 102.69<br>±9.80 | 89.44<br>±14.12 | 86.14<br>±7.99  | -          | 82.00<br>±22.07  | 95.00 <sup>[1]</sup>  | 99.75<br>±12.63 |
| FVC                         | 2.95<br>±.67    | 4.16<br>±1.07   | 2.81<br>±0.69   | 3.95<br>±1.07   | 3.30<br>±0.50   | 5.16<br>±1.95    | 3.44<br>±.68    | 5.17<br>±0.85   | 3.09<br>±0.57   | 3.81<br>±0.63   | -          | 4.34<br>±0.80    | 3.01 <sup>[1]</sup>   | 4.77<br>±0.87   |
| FVC %pred                   | 79.10<br>±16.69 | 80.42<br>±19.39 | 80.22<br>±18.59 | 80.64<br>±18.89 | 87.42<br>±11.73 | 99.45<br>±34.30  | 93.13<br>±15.09 | 93.31<br>±13.57 | 82.56<br>±14.87 | 78.86<br>±11.63 | -          | 80.00<br>±16.64  | 82.00 <sup>[1]</sup>  | 91.00<br>±10.95 |
| FEV <sub>1</sub> /FVC %     | 97.24<br>±3.88  | 94.96<br>±5.97  | 98.11<br>±1.94  | 94.36<br>±7.12  | 95.03<br>±5.85  | 86.18<br>±12.48  | 92.87<br>±6.22  | 93.23<br>±7.89  | 96.60<br>±3.98  | 95.86<br>±5.08  | -          | 87.67<br>±12.06  | 100.00 <sup>[1]</sup> | 92.75<br>±6.18  |
| FEV <sub>1</sub> /FVC %pred | 115.50<br>±4.81 | 114.92<br>±7.24 | 116.17<br>±2.38 | 114.07<br>±8.80 | 112.67<br>±7.00 | 104.18<br>±15.22 | 110.38<br>±7.41 | 112.77<br>±9.51 | 114.52<br>±4.89 | 116.57<br>±6.70 | -          | 106.33<br>±14.57 | 122.00 <sup>[1]</sup> | 112.25<br>±7.46 |

cont.../

| Measure                                | Strings |        | Keyboard |       | Woodwinds |        | Brass  |        | Voice  |        | Percussion |                     | Other                |          |
|----------------------------------------|---------|--------|----------|-------|-----------|--------|--------|--------|--------|--------|------------|---------------------|----------------------|----------|
|                                        | Women   | Men    | Women    | Men   | Women     | Men    | Women  | Men    | Women  | Men    | Women      | Men                 | Women                | Men      |
| <b>Flexibility and range of motion</b> |         |        |          |       |           |        |        |        |        |        |            |                     |                      |          |
| <b>% (n)</b>                           |         |        |          |       |           |        |        |        |        |        |            |                     |                      |          |
| AT 1_R                                 | 93%     | 100%   | 94%      | 93%   | 97%       | 91%    | 100%   | 100%   | 100%   | 100%   | -          | 100%                | 100%                 | 100%     |
|                                        | (39)    | (26)   | (17)     | (13)  | (32)      | (10)   | (8)    | (13)   | (25)   | (7)    |            | (3)                 | (1)                  | (4)      |
| AT 1_R pain                            | 7%      | 0%     | 0%       | 7%    | 0%        | 27%    | 0%     | 8%     | 4%     | 0%     | -          | 0%                  | 100%                 | 0%       |
|                                        | (3)     | (0)    | (0)      | (1)   | (0)       | (3)    | (0)    | (1)    | (1)    | (0)    |            | (0)                 | (1)                  | (0)      |
| AT 1_L                                 | 93%     | 96%    | 100%     | 93%   | 97%       | 73%    | 100%   | 100%   | 100%   | 100%   | -          | 100%                | 100%                 | 100% (4) |
|                                        | (39)    | (25)   | (18)     | (13)  | (32)      | (8)    | (8)    | (13)   | (25)   | (7)    |            | (3)                 | (1)                  |          |
| AT 1_L pain                            | 5%      | 4%     | 0%       | 7%    | 0%        | 9%     | 0%     | 0%     | 0%     | 14%    | -          | 0%                  | 0%                   | 0% (0)   |
|                                        | (2)     | (1)    | (0)      | (1)   | (0)       | (1)    | (0)    | (0)    | (0)    | (1)    |            | (0)                 | (0)                  |          |
| AT 2_R                                 | 81%     | 62%    | 89%      | 57%   | 79%       | 82%    | 100%   | 92%    | 76%    | 71%    | -          | 100%                | 0%                   | 100% (4) |
|                                        | (34)    | (16)   | (16)     | (8)   | (26)      | (9)    | (8)    | (12)   | (19)   | (5)    |            | (3)                 | (0)                  |          |
| AT 2_R pain                            | 12%     | 19%    | 11%      | 29%   | 21%       | 18%    | 0%     | 23%    | 16%    | 14%    | -          | 0%                  | 100%                 | 0%       |
|                                        | (5)     | (5)    | (2)      | (4)   | (7)       | (2)    | (0)    | (3)    | (4)    | (1)    |            | (0)                 | (1)                  | (0)      |
| AT 2_L                                 | 91%     | 81%    | 89%      | 86%   | 88%       | 91%    | 100%   | 100%   | 96%    | 100%   | -          | 100%                | 100%                 | 75% (3)  |
|                                        | (38)    | (21)   | (16)     | (12)  | (29)      | (10)   | (8)    | (13)   | (24)   | (7)    |            | (3)                 | (1)                  |          |
| AT 2_L pain                            | 5%      | 12%    | 6%       | 7%    | 6%        | 9%     | 0%     | 0%     | 4%     | 14%    | -          | 0%                  | 0%                   | 25%      |
|                                        | (2)     | (3)    | (1)      | (1)   | (2)       | (1)    | (0)    | (0)    | (1)    | (1)    |            | (0)                 | (0)                  | (1)      |
| <b>M ± SD</b>                          |         |        |          |       |           |        |        |        |        |        |            |                     |                      |          |
| Beighton                               | 2.07    | 1.54   | 2.50     | .93   | 1.97      | 2.09   | 2.75   | 1.31   | 2.52   | 1.14   | -          | .33                 | 0 <sup>[1]</sup>     | 4.75     |
|                                        | ±1.42   | ±1.56  | ±2.18    | ±1.14 | ±2.31     | ±1.70  | ±1.83  | ±1.38  | ±2.12  | ±1.21  |            | ±.58                |                      | ±2.99    |
| R stretch                              | 3.64    | 3.35   | 3.61     | 3.36  | 3.45      | 3.55   | 3.50   | 3.92   | 3.76   | 4.00   | -          | 4.00 <sup>[1]</sup> | 4.00 <sup>[1]</sup>  | 2.75     |
|                                        | ±.91    | ±1.38  | ±.98     | ±1.15 | ±.94      | ±1.21  | ±1.07  | ±.28   | ±.66   | ±.0    |            |                     |                      | ±1.89    |
| L stretch                              | 3.21    | 2.69   | 3.06     | 2.00  | 2.45      | 3.09   | 3.13   | 3.69   | 3.24   | 3.14   | -          | 4.00 <sup>[1]</sup> | 0 <sup>[1]</sup>     | 2.75     |
|                                        | ±1.32   | ±1.54  | ±1.47    | ±1.75 | ±1.48     | ±1.45  | ±1.13  | ±.75   | ±1.16  | ±1.21  |            |                     |                      | ±.96     |
| Sit and reach                          | 28.71   | 24.27  | 30.19    | 18.21 | 27.52     | 24.82  | 29.75  | 21.92  | 32.72  | 32.29  | -          | 25.33               | 22.00 <sup>[1]</sup> | 30.25    |
|                                        | ±9.51   | ±11.65 | ±12.04   | ±8.88 | ±10.74    | ±10.18 | ±10.86 | ±13.60 | ±10.08 | ±12.42 |            | ±8.74               |                      | ±11.87   |

cont.../

| Measure                       | Strings       |          | Keyboard |          | Woodwinds |          | Brass    |          | Voice    |          | Percussion |                      | Other                  |          |
|-------------------------------|---------------|----------|----------|----------|-----------|----------|----------|----------|----------|----------|------------|----------------------|------------------------|----------|
|                               | Women         | Men      | Women    | Men      | Women     | Men      | Women    | Men      | Women    | Men      | Women      | Men                  | Women                  | Men      |
| <b>Strength and endurance</b> |               |          |          |          |           |          |          |          |          |          |            |                      |                        |          |
|                               | <b>M ± SD</b> |          |          |          |           |          |          |          |          |          |            |                      |                        |          |
| HG-R                          | 26.37         | 39.62    | 26.20    | 36.74    | 27.54     | 39.81    | 26.34    | 43.19    | 27.07    | 36.01    | 25.59      | 42.69                | 27.05                  | 39.03    |
|                               | ±5.12         | ±7.17    | ±3.95    | ±6.70    | ±5.20     | ±9.24    | ±5.18    | ±6.22    | ±4.63    | ±6.25    | ±2.62      | ±8.73                | ±2.86                  | ±6.55    |
| HG-L                          | 25.41         | 37.65    | 24.70    | 34.96    | 26.05     | 38.23    | 25.37    | 40.53    | 25.89    | 35.61    | 24.17      | 40.11                | 26.75                  | 37.83    |
|                               | ±5.09         | ±6.59    | ±3.94    | ±5.54    | ±4.80     | ±8.53    | ±3.39    | ±4.28    | ±3.85    | ±4.95    | ±2.34      | ±8.82                | ±1.52                  | ±6.53    |
| Plank                         | 49.57         | 52.92    | 49.22    | 59.50    | 51.64     | 55.27    | 52.13    | 54.38    | 56.96    | 54.57    | -          | 60.00 <sup>[1]</sup> | 60.00 <sup>[1]</sup>   | 55.25    |
|                               | ±15.66        | ±18.04   | ±14.69   | ±1.87    | ±12.17    | ±9.63    | ±13.48   | ±14.04   | ±11.04   | ±14.36   |            |                      |                        | ±6.18    |
| Press-up                      | 12.40         | 22.00    | 8.99     | 19.57    | 9.18      | 25.64    | 7.75     | 17.23    | 13.40    | 19.29    | -          | 14.33                | 0 <sup>[1]</sup>       | 17.25    |
|                               | ±9.84         | ±16.12   | ±7.93    | ±12.06   | ±7.03     | ±15.13   | ±4.17    | ±7.55    | ±8.36    | ±9.14    |            | ±10.02               |                        | ±18.68   |
| <b>Cardiovascular fitness</b> |               |          |          |          |           |          |          |          |          |          |            |                      |                        |          |
|                               | <b>M ± SD</b> |          |          |          |           |          |          |          |          |          |            |                      |                        |          |
| RecHR                         | 106.68        | 100.50   | 108.14   | 95.38    | 102.36    | 98.30    | 109.17   | 100.82   | 105.29   | 104.64   | 99.00      | 90.25                | 94.00                  | 105.29   |
|                               | ±16.74        | ±17.83   | ±14.70   | ±15.39   | ±19.37    | ±13.03   | ±15.90   | ±18.24   | ±17.04   | ±24.64   | ±3.85      | ±25.23               | ±12.77                 | ±18.17   |
| <b>Physical activity</b>      |               |          |          |          |           |          |          |          |          |          |            |                      |                        |          |
|                               | <b>M ± SD</b> |          |          |          |           |          |          |          |          |          |            |                      |                        |          |
| Walking                       | 1285.82       | 1093.44  | 954.25   | 795.54   | 1665.00   | 583.50   | 1270.50  | 865.62   | 1556.28  | 1560.43  | -          | 2194.50              | 330.00 <sup>[1]</sup>  | 841.50   |
|                               | ±1218.24      | ±906.52  | ±800.21  | ±746.57  | ±1352.83  | ±483.78  | ±1033.06 | ±490.38  | ±1045.56 | ±819.42  |            | ±1709.24             |                        | ±365.99  |
| Moderate                      | 220.48        | 501.54   | 328.89   | 445.71   | 680.00    | 349.09   | 295.00   | 501.54   | 941.60   | 900.00   | -          | 560.00               | 480.00 <sup>[1]</sup>  | 420.00   |
|                               | ±370.40       | ±758.46  | ±501.91  | ±735.87  | ±866.33   | ±357.81  | ±362.18  | ±921.10  | ±1272.14 | ±608.93  |            | ±969.95              |                        | ±494.77  |
| Vigorous                      | 618.10        | 1024.62  | 148.89   | 1057.14  | 722.42    | 1200.00  | 150.00   | 812.31   | 905.60   | 2537.14  | -          | 853.33               | 480.00 <sup>[1]</sup>  | 660.00   |
|                               | ±1007.61      | ±1773.48 | ±245.35  | ±1928.23 | ±1346.92  | ±989.55  | ±285.06  | ±938.00  | ±1114.44 | ±3413.45 |            | ±1211.50             |                        | ±1025.28 |
| Total PA                      | 2124.39       | 2619.60  | 1432.03  | 2298.39  | 3067.42   | 2132.59  | 1715.50  | 2179.46  | 3403.48  | 4997.57  | -          | 3607.83              | 1290.00 <sup>[1]</sup> | 1921.50  |
|                               | ±1777.47      | ±2226.43 | ±1014.06 | ±2489.30 | ±2017.40  | ±1446.23 | ±1015.38 | ±1089.15 | ±2557.00 | ±3829.18 |            | ±3871.30             |                        | ±1292.56 |

Note. M=mean; SD=standard deviation. Measures, abbreviations, and units for each measure are provided in Table 2. *Strings*: violin, viola, viola de Gamba, cello, double bass, guitar (classical and electric), and harp; *Keyboard*: accordion, piano, organ, harpsichord, and historical keyboards; *Woodwinds*: flute, recorder, clarinet, oboe, bassoon, and saxophone; *Brass*: cornet, euphonium, horn, trombone, trumpet, and tuba; *Other*: composition and conducting. <sup>[1]</sup> Values arise from small n values (n<3).
