# Supplementary material for: Fit to Perform: A Profile of Higher Education Music Students’ Physical Fitness
Source: PubMed Central journal article supplement (PMC7066496; doi:10.3389/fpsyg.2020.00298), 2020-03-05
Supplement: Data_Sheet_2.pdf [file Data_Sheet_2.pdf]

**SUPPLEMENTARY TABLE 2 |** Descriptive statistics for the health-related fitness indicators used in the *Fit to Perform* screening protocol by level of study, as well as Mann Whitney U tests for differences by sex.

| Measure                                | Undergraduate |              |                          | Postgraduate  |              |                          |
|----------------------------------------|---------------|--------------|--------------------------|---------------|--------------|--------------------------|
|                                        | Women         | Men          | U, p                     | Women         | Men          | U, p                     |
| <b>Lung function</b>                   | <b>M ± SD</b> |              |                          | <b>M ± SD</b> |              |                          |
| FEV <sub>1</sub>                       | 2.93±0.58     | 4.18±0.75    | <b>241.00, p&lt;.001</b> | 2.84±0.54     | 3.62±1.06    | <b>529.50, p&lt;.001</b> |
| FEV <sub>1</sub> %pred                 | 90.28±14.91   | 94.73±13.38  | 1201.00, p=.157          | 88.74±16.48   | 84.59±22.70  | 949.50, p=.423           |
| FVC                                    | 3.12±0.65     | 4.50±0.88    | <b>261.50, p&lt;.001</b> | 3.04±0.61     | 4.36±1.59    | <b>443.50, p&lt;.001</b> |
| FVC %pred                              | 83.34±14.87   | 85.43±12.92  | 1364.00, p=.683          | 82.66±16.54   | 86.00±28.60  | 975.50, p=.547           |
| FEV <sub>1</sub> /FVC %                | 96.62±4.55    | 95.00 ±6.52  | 1399.50, p=.847          | 96.19±4.72    | 90.44±9.49   | <b>638.50, p=.001</b>    |
| FEV <sub>1</sub> /FVC %pred            | 114.45±5.43   | 114.93 ±7.88 | 1076.50, p=.280          | 114.34±5.83   | 109.53±11.72 | 836.00, p=.093           |
| <b>Flexibility and range of motion</b> | <b>% (n)</b>  |              |                          | <b>% (n)</b>  |              |                          |
| AT 1_R                                 | 99% (64)      | 98% (43)     | 1419.50, p=.780          | 94% (58)      | 97% (33)     | 1017.00, p=.461          |
| AT 1_R pain                            | 3% (2)        | 5% (2)       | 1409.00, p=.780          | 5% (3)        | 9% (3)       | 1010.00, p=.443          |
| AT 1_L                                 | 100% (65)     | 93% (41)     | <b>1332.50, p=.034</b>   | 94% (58)      | 94% (32)     | 1048.00, p=.913          |
| AT 1_L pain                            | 2% (1)        | 5% (2)       | 1387.00, p=.349          | 2% (1)        | 6% (2)       | 109.00, p=.253           |
| AT 2_R                                 | 85% (55)      | 71% (31)     | 1227.50, p=.077          | 77% (48)      | 77% (26)     | 1044.00, p=.916          |
| AT 2_R pain                            | 12% (8)       | 16% (7)      | 1378.50, p=.594          | 18% (11)      | 24% (8)      | 993.00, p=.448           |
| AT 2_L                                 | 92% (60)      | 91% (40)     | 1410.00, p=.796          | 90% (56)      | 85% (29)     | 1001.00, p=.462          |
| AT 2_L pain                            | 5% (3)        | 9% (4)       | 1366.00, p=.352          | 5% (3)        | 9% (3)       | 1012.00, p=.443          |
|                                        | <b>M ± SD</b> |              |                          | <b>M ± SD</b> |              |                          |
| Beighton                               | 1.75±1.98     | 0.86±1.17    | <b>1093.00, p=.028</b>   | 2.71±1.81     | 2.44±1.86    | 947.00, p=.404           |
| R stretch                              | 3.55±1.04     | 3.48±1.23    | 1419.50, p=.925          | 3.66±.67      | 3.59±1.02    | 1001.00, p=.591          |
| L stretch                              | 2.94±1.53     | 2.88±1.56    | 1418.50, p=.935          | 3.00±1.21     | 2.88±1.34    | 1012.50, p=.733          |
| Sit and reach                          | 29.38±10.09   | 21.59±11.53  | <b>862.00, p&lt;.001</b> | 29.45±10.79   | 26.67±11.13  | 917.50, p=.295           |

cont.../

| Measure                       | Undergraduate   |                 |                           | Postgraduate    |                 |                          |
|-------------------------------|-----------------|-----------------|---------------------------|-----------------|-----------------|--------------------------|
|                               | Women           | Men             | U, p                      | Women           | Men             | U, p                     |
| <b>Strength and endurance</b> | <b>M ± SD</b>   |                 |                           | <b>M ± SD</b>   |                 |                          |
| HG-R                          | 26.53±4.91      | 38.85±6.91      | 1723.00, p=.935           | 26.95±4.68      | 40.91±8.76      | <b>474.50, p&lt;.001</b> |
| HG-L                          | 25.28±4.64      | 37.08±6.32      | <b>1723.00, p&lt;.001</b> | 25.79±4.39      | 38.83±7.18      | <b>371.00, p&lt;.001</b> |
| Plank                         | 51.29±12.05     | 51.66±16.70     | 1252.00, p=.218           | 52.24±15.37     | 59.82±1.03      | 995.00, p=.646           |
| Press-up                      | 10.89±8.94      | 18.32±12.19     | <b>853.00, p&lt;.001</b>  | 10.85±8.02      | 23.32±14.47     | <b>472.00, p&lt;.001</b> |
| <b>Cardiovascular fitness</b> | <b>M ± SD</b>   |                 |                           | <b>M ± SD</b>   |                 |                          |
| RecHR                         | 104.55±17.04    | 98.14±17.45     | <b>10149.50, p=.001</b>   | 107.17±16.69    | 102.42±18.01    | 2310.50, p=.090          |
| <b>Physical activity</b>      | <b>M ± SD</b>   |                 |                           | <b>M ± SD</b>   |                 |                          |
| Walking                       | 1338.53±1067.80 | 1135.13±883.98  | 1292.00, p=.392           | 1427.78±1274.41 | 828.40±726.53   | <b>797.50, p=.049</b>    |
| Moderate                      | 379.38±515.78   | 563.18±730.87   | 1243.00, p=.233           | 634.52±1029.72  | 427.06±692.94   | 929.50, p=.328           |
| Vigorous                      | 665.23±1173.66  | 1185.45±1701.98 | <b>110.50, p=.039</b>     | 541.29±910.52   | 1058.82±1867.99 | 847.50, p=.097           |
| Total PA                      | 2383.15±1597.74 | 2883.76±2264.87 | 1215.00, p=.478           | 2603.59±2362.04 | 2314.28±2379.27 | 986.00, p=.602           |

Note. M=mean; SD=standard deviation. Measures, abbreviations, and units for each measure are provided in Table 2.
